# Supplementary material for: Estimating Baseline Serum Creatinine for Assessing Acute Kidney Injury: Not a One Size Fits All Approach
Source: PubMed Central journal article supplement — Kidney Int Rep. 2021 Feb 6;6(3):562–4. doi: 10.1016/j.ekir.2021.01.030 (PMC7938179; doi:10.1016/j.ekir.2021.01.030), 2021-02-06
Supplement: mmc1.pdf [file mmc1.pdf]

## Supplemental References

- S1. Sims AJ, Hussein HK, Prabhu M, *et al.* Are surrogate assumptions and use of diuretics associated with diagnosis and staging of acute kidney injury after cardiac surgery? *Clinical journal of the American Society of Nephrology : CJASN* 2012; **7**: 15-23.
- S2. Pickering JW, Endre ZH. Back-calculating baseline creatinine with MDRD misclassifies acute kidney injury in the intensive care unit. *Clinical journal of the American Society of Nephrology : CJASN* 2010; **5**: 1165-1173.
- S3. Siew ED, Matheny ME, Ikizler TA, *et al.* Commonly used surrogates for baseline renal function affect the classification and prognosis of acute kidney injury. *Kidney international* 2010; **77**: 536-542.
- S4. Siew ED, Peterson JF, Eden SK, *et al.* Use of multiple imputation method to improve estimation of missing baseline serum creatinine in acute kidney injury research. *Clinical journal of the American Society of Nephrology : CJASN* 2013; **8**: 10-18.
- S5. Zappitelli M, Parikh CR, Akcan-Arikan A, *et al.* Ascertainment and epidemiology of acute kidney injury varies with definition interpretation. *Clinical journal of the American Society of Nephrology : CJASN* 2008; **3**: 948-954.
- S6. Zavada J, Hoste E, Cartin-Ceba R, *et al.* A comparison of three methods to estimate baseline creatinine for RIFLE classification. *Nephrology, dialysis, transplantation : official publication of the European Dialysis and Transplant Association - European Renal Association* 2010; **25**: 3911-3918.
- S7. Thongprayoon C, Cheungpasitporn W, Harrison AM, *et al.* The comparison of the commonly used surrogates for baseline renal function in acute kidney injury diagnosis and staging. *BMC Nephrol* 2016; **17**: 6.
- S8. Bernardi MH, Schmidlin D, Ristl R, *et al.* Serum Creatinine Back-Estimation in Cardiac Surgery Patients: Misclassification of AKI Using Existing Formulae and a Data-Driven Model. *Clinical journal of the American Society of Nephrology : CJASN* 2016; **11**: 395-404.
- S9. Arnold J, Sims D, Gill P, *et al.* Acute kidney injury calculated using admission serum creatinine underestimates 30-day and 1-year mortality after acute stroke. *Clinical kidney journal* 2020; **13**: 46-54.
- S10. Macedo E, Bouchard J, Soroko SH, *et al.* Fluid accumulation, recognition and staging of acute kidney injury in critically-ill patients. *Critical care* 2010; **14**: R82.

- S11. Prowle JR, Leitch A, Kirwan CJ, *et al.* Positive fluid balance and AKI diagnosis: assessing the extent and duration of 'creatinine dilution'. *Intensive care medicine* 2015; **41**: 160-161.
- S12. Schetz M, Gunst J, Van den Berghe G. The impact of using estimated GFR versus creatinine clearance on the evaluation of recovery from acute kidney injury in the ICU. *Intensive care medicine* 2014; **40**: 1709-1717.
- S13. Prowle JR, Kolic I, Purdell-Lewis J, *et al.* Serum creatinine changes associated with critical illness and detection of persistent renal dysfunction after AKI. *Clinical journal of the American Society of Nephrology : CJASN* 2014; **9**: 1015-1023.
